# Supplementary material for: Iso-Seq analysis of the Taxus cuspidata transcriptome reveals the complexity of Taxol biosynthesis
Source: BMC Plant Biol. 2019 May 21;19:210. doi: 10.1186/s12870-019-1809-8 (PMC6530051; doi:10.1186/s12870-019-1809-8)
Supplement: Supplementary file 3 — Table S3. RNA-Seq data of identified genes and candidates for Taxol biosynthesis in T. cuspidata. (XLSX 46 kb) [file 12870_2019_1809_MOESM3_ESM.xlsx]

## Sheet: 工作表1
Gene	R_FPKM	S_FPKM	L_FPKM	log2FoldChange（S vs R）	log2FoldChange（L vs R）	log2FoldChange（L vs S）
HMGS	17.1813	20.5854	14.1431	0.258804	-0.231362	-0.490166
HMGR	8.74667	10.5272	7.41627	0.28006	-0.219361	-0.499422
DXS	69.6272	60.5638	84.2852	-0.268507	0.315199	0.583705
DXR	25.9057	22.9398	36.9143	-0.205982	0.513496	0.719478
GGPPS	32.4399	24.2322	32.0331	-0.50325	0.0245881	0.527838
TS	71.5269	51.7812	5.90039	-0.395326	-3.51908	-3.12376
T2αH	10.3053	3.52308	25.8461	-1.59482	1.42068	3.0155
T5αH	73.9173	51.1066	14.0188	-0.511624	-2.34379	-1.83216
T7βH	0.153643	0.634938	0.0106961	1.76717	-3.70044	-5.46761
T10βH	11.938	8.96089	6.3738	-0.401477	-0.841853	-0.440376
T13αH	1.18688	0.719124	0.515554	-0.952411	-1.24903	-0.296617
TAT	4.56682	1.09707	1.12429	-2.00594	-1.84169	0.164251
TBT	0.264599	0.0181368	0.0305205	-4.03953	-3.03953	1
DBAT	27.116	23.0068	3.35703	-0.206083	-2.9655	-2.75942
BAPT	22.0471	8.89775	1.11142	-1.41978	-4.2656	-2.84583
DBTNBT	0.0647973	0.0064169	0.0402812	-3.45943	-0.459432	3
PAM	10.8774	12.1314	37.7716	0.0971012	1.94911	1.852
TcuCYP725A26	6.18155	4.5295	6.63047	-0.495011	0.228428	0.723439
TcuCYP725A21	77.5558	12.3676	45.3741	-2.75904	-0.745964	2.01307
TcuCYP716B29	16.587	18.6783	21.2482	0.186426	0.407246	0.22082
TcuCYP725A25	3.00363	0.415163	3.44703	-2.84022	0.331428	3.17165
TcuCYP725A9	67.009	6.82402	8.7355	-3.38046	-2.98599	0.394462
TcuCYP716B31	14.2075	17.6491	10.575	0.265892	-0.359091	-0.624983
TcuCYP725A29	5.51703	0	0.00844632	#NUM!	-9.13955	#DIV/0!
TcuCYP725A28	7.50781	3.94267	10.5259	-1.09153	0.516718	1.60825
TcuCYP725A22	2.78937	3.5705	2.00973	0.354065	-0.357655	-0.71172
TcuCYP725A20	2.14095	0.311947	0.820241	-2.60723	-1.19943	1.40781
TcuCYP725A27	5.6074	4.44195	4.75864	-0.488467	-0.259567	0.2289
TcuCYP716B32	10.7225	5.57501	5.84494	-0.795706	-0.760721	0.0349854
TcuCYP725A24	5.2959	2.67062	4.89353	-1.12308	0.00122835	1.1243
TcuACT7	0.981472	2.10598	77.818	1.00568	6.48948	5.4838
TcuACT8	32.9498	15.3238	33.2693	-1.10776	0.197385	1.30515
TcuACT9	32.5779	9.57926	19.6347	-1.71716	-0.626577	1.09058
TcuACT10	36.7873	36.3483	6.50189	0.0148422	-2.37154	-2.38639
TcuACT13	5.84124	5.19207	37.9317	-0.239746	2.75858	2.99832
TcuACT16	5.45876	2.22848	1.3736	-1.29611	-1.92134	-0.625226
TcuACT17	0.000189621	9.50732e-05	0.000109906	-1	-0.584963	0.415037
TcuACT21	55.5378	20.981	43.0121	-1.34975	-0.216902	1.13285
TcuACT22	10.3945	4.82096	28.875	-1.16616	1.6274	2.79356
TcuACT25	2.22347	2.36115	1.54132	0.0942361	-0.391191	-0.485427
TcuACT30	29.3905	20.5806	14.6038	-0.485277	-0.872319	-0.387042

## Sheet: 工作表2
Gene	R_FPKM	S_FPKM	L_FPKM	log2FoldChange（S vs R）	log2FoldChange（L vs R）	log2FoldChange（L vs S）
TcuWRKY45	5.77204	2.63016	0.206223	-1.2167	-4.64172	-3.42502
TcJamyc1	1.80349	2.64618	1.14486	0.611755	-0.793314	-1.40507
TcJamyc4	11.49	9.45096	5.21086	-0.327925	-1.07824	-0.75032
TcubHLH94	8.41169	6.72134	5.74673	-0.32775	-0.538564	-0.210814
TcERF12	3.05627	0.052057	0.654268	-5.9386	-2	3.9386
TcERF15	2.13671	0.148242	0.982758	-3.974	-1.02647	2.94753
TcuERF18	1.81732	1.46116	0.701769	-0.290606	-1.3101	-1.0195
TcuERF25	18.9723	1.44434	11.0919	-3.75094	-1.46736	2.28358
TcuERF44	0.805165	0	0.306394	#NUM!	-1.43296	#DIV/0!
TcuERF77	31.9375	10.8813	16.6848	-1.66357	-0.905525	0.758047
TcuERF81	12.3703	1.73938	2.49963	-2.90771	-2.23892	0.668794
TcuERF99	18.5103	20.6125	22.5918	0.0989513	0.302296	0.203345
TcuERF107	22.6029	4.60834	2.51939	-2.43195	-3.17498	-0.743027
